# Supplementary material for: Extended Infusion of Meropenem in Neonatal Sepsis: A Historical Cohort Study
Source: MDPI journal article supplement (doi:10.3390/antibiotics11030341), 2022-03-04
Supplement: s1 [file s1]

## Article

# Extended Infusion of Meropenem in Neonatal Sepsis: A Historical Cohort Study

Guangna Cao <sup>1,†</sup>, Pengxiang Zhou <sup>2,3,†</sup>, Hua Zhang <sup>4</sup>, Bangkai Sun <sup>5</sup>, Xiaomei Tong <sup>1,\*</sup> and Yan Xing <sup>1,\*</sup>

<sup>1</sup> Department of Pediatrics, Peking University Third Hospital, Beijing 100191, China; guangnacao@bjmu.edu.cn

<sup>2</sup> Department of Pharmacy, Peking University Third Hospital, Beijing 100191, China; pxzhou0427@bjmu.edu.cn

<sup>3</sup> Peking University Health Science Center, Institute for Drug Evaluation, Beijing 100191, China

<sup>4</sup> Research Center of Clinical Epidemiology, Peking University Third Hospital, Beijing 100191, China; zhanghua@bjmu.edu.cn

<sup>5</sup> Information Management and Big Data Center, Peking University Third Hospital, Beijing 100191, China; bangkaisun@bjmu.edu.cn

† These authors contributed equally to this article.

\* Correspondence: tongxiaomei@bjmu.edu.cn (X.T.); xingyan@bjmu.edu.cn (Y.X.); Tel.: +86-010-8226-7671 (X.T.); +86-010-8226-7677 (Y.X.)

## Supplementary Materials

**Table S1** Baseline characteristics of VLBW neonates

| Characteristic            | EI group (n=86) | STI group (n=99) | P-values |
|---------------------------|-----------------|------------------|----------|
| Age (weeks), Mean (SD)    | 29.53±2.33      | 29.49±2.08       | 0.919    |
| Weight (grams), Mean (SD) | 1064.53±214.24  | 1071.31±235.29   | 0.839    |
| Poor response             | 75 (87.2%)      | 79 (79.8%)       | 0.178    |
| Antibiotics Upgrade       | 31 (36.05%)     | 40 (40.4%)       | 0.543    |
| CRT extension             | 7 (8.1%)        | 15 (15.2%)       | 0.142    |
| Hypothermia               | 7 (8.1%)        | 7 (7.1%)         | 0.784    |
| Apnea                     | 50 (58.1%)      | 54 (54.6%)       | 0.623    |
| Dyspnea                   | 49 (57.0%)      | 58 (58.6%)       | 0.825    |
| Abdominal distention      | 25 (29.1%)      | 27 (27.3%)       | 0.786    |
| Vomiting                  | 2 (2.3%)        | 4 (4.0%)         | 0.810    |
| Heart rate increase       | 36 (41.9%)      | 38 (38.4%)       | 0.630    |
| Hypotension               | 5 (5.8%)        | 9 (9.1%)         | 0.401    |
| Cool extremities          | 7 (8.1%)        | 14 (14.1%)       | 0.199    |
| Jaundice                  | 6 (7.0%)        | 11 (11.1%)       | 0.332    |
| Scleroderma               | 4 (4.7%)        | 5 (5.1%)         | 1.000    |
| Pale or Grey complexion   | 45 (52.3%)      | 42 (42.4%)       | 0.178    |
| Convulsions               | 0 (0%)          | 4 (4.0%)         | 0.168    |

Note: EI, extended infusion; STI, short-term infusion; SD, standard deviation; CRT, capillary refill time.

**Table S2 univariate analyses results of VLBW infants**

| Outcomes                     | EI group(n=86) | STI group (n=99) | P-values |
|------------------------------|----------------|------------------|----------|
| 3-day clinical efficacy rate | 65 (75.6%)     | 56 (56.6%)       | 0.007    |
| 3-day microbial clearance    | 81 (94.2%)     | 84 (84.8%)       | 0.041    |
| 3-day CRP recovery rate      | 18 (20.9%)     | 14 (14.1%)       | 0.223    |
| 3-day WBC recovery rate      | 38 (44.2%)     | 42 (42.4%)       | 0.809    |

Note: VLBW, Very Low Birth Weight Infants; EI, extended infusion; STI, short-term infusion; CRP, C-reactive protein; WBC, white blood cell.

**Table S3 multivariate analyses results of VLBW infants**

| Predictive factors      | Odds Ratio (95% CI)                 | P-values     | Odds Ratio (95% CI)              | P-values          |
|-------------------------|-------------------------------------|--------------|----------------------------------|-------------------|
| <b>Outcomes</b>         | <b>3-day clinical efficacy rate</b> |              | <b>3-day microbial clearance</b> |                   |
| Infusion time           | <b>0.39 (0.2, 0.78)</b>             | <b>0.008</b> | 5.51 (0.99, 30.65)               | 0.051             |
| Age (weeks)             | 0.98 (0.82, 1.16)                   | 0.796        | <b>0.58 (0.37, 0.89)</b>         | <b>0.013</b>      |
| Weight (grams)          | 1 (1, 1)                            | 0.505        | 1 (1, 1)                         | 0.776             |
| Poor response           | 0.04 (0, 1.35)                      | 0.074        | 0.53 (0.09, 3.31)                | 0.500             |
| Antibiotics Upgrade     | 0.57 (0.27, 1.18)                   | 0.128        | 0.51 (0.1, 2.53)                 | 0.406             |
| CRT extension           | 0.87 (0.19, 3.99)                   | 0.862        | 2.75 (0.17, 43.71)               | 0.474             |
| Hypothermia             | 1.8 (0.42, 7.66)                    | 0.426        | 4.29 (0.31, 60.13)               | 0.279             |
| Apnea                   | 0.7 (0.34, 1.44)                    | 0.331        | 0.83 (0.16, 4.38)                | 0.830             |
| Dyspnea                 | 0.7 (0.35, 1.42)                    | 0.323        | 0.44 (0.11, 1.81)                | 0.255             |
| Abdominal distention    | 2.11 (0.91, 4.89)                   | 0.081        | 1.93 (0.32, 11.7)                | 0.477             |
| Vomiting                | 0.26 (0.04, 1.75)                   | 0.166        | 16.76 (0.82, 344.21)             | 0.067             |
| Heart rate increase     | 0.7 (0.34, 1.43)                    | 0.326        | 1.03 (0.23, 4.65)                | 0.968             |
| Hypotension             | 4.25 (0.69, 26.24)                  | 0.119        | <b>13.98 (1.31, 149.25)</b>      | <b>0.029</b>      |
| Cool extremities        | 0.53 (0.13, 2.15)                   | 0.376        | 1.34 (0.11, 17.08)               | 0.820             |
| Jaundice                | 1.19 (0.37, 3.86)                   | 0.773        | 4.46 (0.4, 49.13)                | 0.222             |
| Scleroderma             | 0.36 (0.08, 1.54)                   | 0.169        | <b>211.65 (15, 2986.66)</b>      | <b>&lt; 0.001</b> |
| Pale or Grey complexion | 1.16 (0.55, 2.42)                   | 0.699        | 1.37 (0.29, 6.59)                | 0.694             |
| Convulsions             | 0.48 (0.05, 5.13)                   | 0.545        | 1.42 (0.04, 50.66)               | 0.849             |

Note: VLBW, Very Low Birth Weight Infants; CRT, capillary refill time. The bold figures indicate statistical differences

**Table S4 Baseline characteristics of 2-h or 3-h EI group**

| Characteristic            | 2h EI group (n=67)   | 3h EI group (n=60) | p-values |
|---------------------------|----------------------|--------------------|----------|
| Age (weeks), Mean (SD)    | 30.86 (29.07, 32.64) | 30.71 (28.43, 33)  | 0.927    |
| Weight (grams), Mean (SD) | 1230 (1050, 1610)    | 1200 (940, 1705)   | 0.338    |
| Poor response             | 60 (89.6%)           | 50 (83.3%)         | 0.304    |
| Antibiotics Upgrade       | 18 (26.9%)           | 21 (35%)           | 0.321    |
| CRT extension             | 5 (7.5%)             | 6 (10%)            | 0.612    |

| Characteristic          | 2h EI group (n=67) | 3h EI group (n=60) | p-values |
|-------------------------|--------------------|--------------------|----------|
| Hypothermia             | 12 (18.0%)         | 11 (18.3%)         | 0.951    |
| Apnea                   | 31 (46.3%)         | 29 (48.3%)         | 0.816    |
| Dyspnea                 | 34 (50.8%)         | 33 (55%)           | 0.632    |
| Abdominal distention    | 16 (23.9%)         | 23 (38.3%)         | 0.078    |
| Vomiting                | 1 (1.5%)           | 3 (5%)             | 0.535    |
| Heart rate increase     | 24 (35.8%)         | 21 (35%)           | 0.923    |
| Hypotension             | 5 (7.5%)           | 2 (3.3%)           | 0.530    |
| Cool extremities        | 4 (6.0%)           | 8 (13.3%)          | 0.157    |
| Jaundice                | 12 (17.9%)         | 7 (11.7%)          | 0.325    |
| Scleroderma             | 3 (4.5%)           | 3 (5%)             | 1.000    |
| Pale or Grey complexion | 27 (40.3%)         | 33 (55%)           | 0.098    |
| Convulsions             | 0 (0.0%)           | 0 (0.0%)           | NA       |

Note: EI, extended infusion; CRT, capillary refill time.

**Table S5 univariate analyses results of 2-h or 3-h EI group**

| Outcomes                     | 2h EI group (n=67) | 3h EI group (n=60) | P-values |
|------------------------------|--------------------|--------------------|----------|
| 3-day clinical efficacy rate | 57 (85.1%)         | 47 (78.3%)         | 0.325    |
| 3-day microbial clearance    | 63 (94.0%)         | 57 (95.0%)         | >0.999   |
| 3-day CRP recovery rate      | 34 (50.7%)         | 33 (55.0%)         | 0.632    |
| 3-day WBC recovery rate      | 14 (20.9%)         | 16 (26.7%)         | 0.445    |

Note: EI, extended infusion; CRP, C-reactive protein; WBC, white blood cell.

**Table S6** Judgment criteria of clinical effectiveness

| Judgment criteria     | Normal temperature (36.5°C to 37.5 °C) | Normal blood pressure | Normal heart rate | Non vasoactive drug use | Invasive mechanical ventilation is not required | No pale complexion or blooming | Good response | Normal CRT | No sclerodema | Good intestinal tolerance | No jaundice | No vomiting | No abdominal distension |
|-----------------------|----------------------------------------|-----------------------|-------------------|-------------------------|-------------------------------------------------|--------------------------------|---------------|------------|---------------|---------------------------|-------------|-------------|-------------------------|
| Clinical efficacy     | √                                      | √                     | √                 | √                       | √                                               | √                              | √             | √          | √             | ±                         | ±           | ±           | ±                       |
| Clinical non-efficacy | x                                      | x                     | x                 | x                       | x                                               | x                              | x             | x          | x             | ±                         | ±           | ±           | ±                       |

Note: The clinical effectiveness of each patient was judged by two newborn pediatricians (G.C. and Y.X.). CRT, capillary refill time
